# Supplementary material
Source: publisher figshare collection journal article supplement (https://karger.figshare.com/ndownloader/files/14479394)
Supplement: Supplementary file 1 [file 14479394]

**Supplementary Table 2.** Mean percentage (±SEM) of c-Fos+ tdTomato+ neurons detected in *Kiss1CreEGFP/wt/Rosa26lox-stop-lox-tdTomato/wt* male mice after exposure to water (control) or female urine in the anteroventral periventricular nucleus (AVPV, n=4 in each group) and the arcuate nucleus (ARC, n=3 in each group) along with the corresponding unpaired two-tailed student’s *t*-test analysis.

|  | Control | Urine exposed |
| --- | --- | --- |
| Total number of AVPVKiss (tdTomato+) neurons analysed | 654 | 654 |
| Number of c-Fos+ AVPVKiss (tdTomato+) neurons | 27 | 41 |
| Percentage of c-Fos+ AVPVKiss (tdTomato+) neurons | 5 ± 0.82 | 6.5 ± 1.4a |
| Total number of ARCKiss (tdTomato+) neurons analysed | 162 | 203 |
| Number of c-Fos+ ARCKiss (tdTomato+) neurons | 2 | 1 |
| Percentage of c-Fos+ ARCKiss (tdTomato+) neurons | 0.85 ± 0.85 | 0.5 ± 0.5a |

a NS, no significant difference vs the corresponding nucleus of the control subjects (unpaired two-tailed student’s *t*-test)
